# Supplementary material for: Organic acids as efficient catalysts for group transfer polymerization of N,N-disubstituted acrylamide with silyl ketene acetal: polymerization mechanism and synthesis of diblock copolymers
Source: Royal Society of Chemistry journal article supplement (doi:10.1039/c5py01104c), 2015-01-01
Supplement: c5py01104c1.pdf [file c5py01104c1.pdf]

## Supplementary Information

### **Organic Acids as Efficient Catalyst for Group Transfer Polymerization of *N,N*-Disubstituted Acrylamide with Silyl Ketene Acetal; Polymerization Mechanism and Synthesis of Diblock Copolymers**

*Seiya Kikuchi,<sup>a</sup> Yougen Chen,<sup>b</sup> Kodai Kitano,<sup>a</sup>*

*Kenji Takada,<sup>c</sup> Toshifumi Satoh,<sup>c</sup> and Toyoji Kakuchi\*<sup>b, c</sup>*

<sup>a</sup> Graduate School of Chemical Sciences and Engineering, Hokkaido University, N13W8, Kita-ku, Sapporo 060-8628, Japan

<sup>b</sup> Frontier Chemistry Center, Faculty of Engineering, Hokkaido University, N13W8, Kita-ku, Sapporo, 060-8628, Japan.

<sup>c</sup> Division of Applied Chemistry, Faculty of Engineering, Hokkaido University, N13W8, Kita-ku, Sapporo, 060-8628, Japan.

Tel & Fax: +81-11-706-6602. E-mail: [kakuchi@poly-bm.eng.hokudai.ac.jp](mailto:kakuchi@poly-bm.eng.hokudai.ac.jp)

† Hokkaido University.

## Experimental Section

**Synthesis of *N,N*-di-*n*-propylacrylamide (DnPAA).** To a suspension of di-*n*-propylamine (25.0 mL, 182 mmol), 1-methylimidazole (1.37 mL, 17.3 mmol), *N,N,N',N'*-tetramethylethylenediamine (TMEDA, 2.58 mL, 17.3 mmol), and K<sub>2</sub>CO<sub>3</sub> (25.2 g, 182 mmol) in acetonitrile (300 mL), acryloyl chloride (14.0 mL, 173 mmol) was added dropwise at 0 °C. After stirring for 6 h, the reaction mixture was filtered, and then condensed under reduced pressure. The crude product was purified by column chromatography (hexane:ethyl acetate = 2:1, *R*<sub>f</sub> = 0.35) followed by distillation over CaH<sub>2</sub> under reduced pressure (50 °C/ 0.17 mmHg), affording *N,N*-di-*n*-propylacrylamide as a transparent liquid. Yield, 11.1 g (41.2 %). <sup>1</sup>H NMR (400 MHz, CDCl<sub>3</sub>): δ (ppm) 0.78-0.88 (m, 6H, -CH<sub>3</sub>), 1.45-1.58 (m, 4H, -CH<sub>2</sub>CH<sub>3</sub>), 3.15-3.29 (m, 4H, -NCH<sub>2</sub>-), 5.52-5.59 (m, 1H, CH<sub>2</sub>=CH-), 6.20-6.28 (m, 1H, *trans* CH<sub>2</sub>=CH-), 6.42-6.52 (m, 1H, *cis* CH<sub>2</sub>=CH-). <sup>13</sup>C NMR (100 MHz, CDCl<sub>3</sub>): δ (ppm) 11.2, 11.5, 21.0, 22.9, 48.3, 49.8, 127.4, 127.9.

**Synthesis of *N*-acryloylpiperidine (API).** To a solution of piperidine (25.0 mL, 253 mmol), trimethylamine (42.0 mL, 303 mmol), and CH<sub>2</sub>Cl<sub>2</sub> (300 mL), acryloyl chloride was added dropwise at 0 °C. After stirring for 16 h at r.t., the reaction mixture was extracted by 0.5N HCl, NaCl aq., and distilled water. Organic layer was dried over MgSO<sub>4</sub>, and then condensed under reduced pressure. The crude product was purified by distillation using CaH<sub>2</sub> under reduced pressure (97 °C/ 6.0 mmHg), affording *N*-acryloylpiperidine as a transparent liquid. Yield, 9.79 g (29.3 %). <sup>1</sup>H NMR (400 MHz, CDCl<sub>3</sub>): δ (ppm) 1.49-1.59 (m, 4H, -CH<sub>2</sub>CH<sub>2</sub>CH<sub>2</sub>-), 1.59-1.67 (m, 2H, -CH<sub>2</sub>CH<sub>2</sub>CH<sub>2</sub>-), 3.40-3.64 (m, 4H, -NCH<sub>2</sub>-), 5.58-5.65 (m, 1H, CH<sub>2</sub>=CH-), 6.17-6.25 (m, 1H,

*trans* CH<sub>2</sub>=CH-), 6.50-6.59 (m, 1H, *cis* CH<sub>2</sub>=CH-). <sup>13</sup>C NMR (100 MHz, CDCl<sub>3</sub>): δ (ppm) 24.6, 25.5, 26.6, 43.0, 47.0, 127.0, 128.1, 165.2.

**Synthesis of *N*-methoxyethyl-*N*-methyl-acrylamide (MMEAA).** To a suspension of KOH (22.4 g, 400 mmol) in DMSO (200 mL), *N*-2-hydroxy-*N*-methylacrylamide (11.5 g, 100 mmol) was added, and then iodomethane (24.9 mL, 400 mmol) was added at room temperature. After stirring for 30 min with exothermic reaction, reaction mixture was quenched by excess amount of water followed by the extraction with ethyl acetate. The organic phase dried over anhydrous MgSO<sub>4</sub>, and concentrated under reduced pressure. The crude product was purified by column chromatography (ethyl acetate, *R*<sub>f</sub> = 0.31) and distillation from CaH<sub>2</sub> under reduced pressure (55-56 °C/ 0.10 mmHg), affording *N*-methoxyethyl-*N*-methyl-acrylamide as pale yellow solid. Yield, 3.46 g (24.2 %). <sup>1</sup>H NMR (400 MHz, CDCl<sub>3</sub>): δ (ppm) 2.92, 3.04 (s, 3H, NCH<sub>3</sub>), 3.23 (s, 3H, OCH<sub>3</sub>), 3.37-3.53 (m, 4H, -CH<sub>2</sub>CH<sub>2</sub>-), 5.51-5.60 (m, 1H, CH<sub>2</sub>=CH-), 6.15-6.24 (m, 1H, *trans* CH<sub>2</sub>=CH-), 6.46-6.57 (m, 1H, *cis* CH<sub>2</sub>=CH-). <sup>13</sup>C NMR (100 MHz, CDCl<sub>3</sub>): δ (ppm) 34.5, 37.1, 48.0, 49.7, 58.8, 59.2, 70.6, 71.0, 127.4, 127.7, 127.8, 128.0, 166.3, 166.9. Anal. Calcd for C<sub>7</sub>H<sub>13</sub>NO<sub>2</sub> (143.18): C, 58.72; H, 9.15; N, 9.78. Found: C, 58.72; H, 9.23; N, 9.81.

**Synthesis of *N,N*-bis(methoxyethyl)acrylamide (BMEAA).** The procedure of synthesis of DnPAA was applied to bis(methoxyethyl)amine (15.0 mL, 102 mmol), 1-methylimidazole (0.87 mL, 11.0 mmol), TMEDA (1.64 mL, 11.0 mmol), K<sub>2</sub>CO<sub>3</sub> (34.5 g, 250 mmol), acetonitrile (200 mL), and acryloyl chloride (8.89 mL, 110 mmol). *N,N*-bis(methoxyethyl)acrylamide was obtained as transparent liquid purified by distillation using CaH<sub>2</sub> under reduced pressure (77 °C/

0.03 mmHg). Yield, 6.08 g (32.5 %).  $^1\text{H}$  NMR (400 MHz,  $\text{CDCl}_3$ ):  $\delta$  (ppm) 3.20 (s, 6H,  $\text{OCH}_3$ ), 3.35-3.54 (m, 8H,  $-\text{CH}_2\text{CH}_2-$ ), 5.50-5.57 (m, 1H,  $\text{CH}_2=\text{CH}-$ ), 6.15-6.23 (m, 1H, *trans*  $\text{CH}_2=\text{CH}-$ ), 6.50-6.59 (m, 1H, *cis*  $\text{CH}_2=\text{CH}-$ ).  $^{13}\text{C}$  NMR (100 MHz,  $\text{CDCl}_3$ ):  $\delta$  (ppm) 47.0, 48.9, 58.7, 59.0, 71.0, 71.1, 127.6, 128.1, 166.6. Anal. Calcd for  $\text{C}_9\text{H}_{17}\text{NO}_3$  (187.23): C, 57.73; H, 9.15; N, 7.48. Found: C, 57.42; H, 9.18; N, 7.48.

**Synthesis of *N,N*-diallylacrylamide (DAIAA).** The procedure for the synthesis of API was applied to diallylamine (25.0 mL, 203 mmol), trimethylamine (36.6 mL, 264 mmol),  $\text{CH}_2\text{Cl}_2$  (300 mL), and acryloyl chloride (14.8 mL, 183 mmol). *N,N*-diallylacrylamide was obtained as a transparent liquid purified after distillation over  $\text{CaH}_2$  under reduced pressure (61 °C/ 0.07 mmHg). Yield, 14.7 g (53.2 %).  $^1\text{H}$  NMR (400 MHz,  $\text{CDCl}_3$ ):  $\delta$  (ppm) 3.85-4.10 (m, 4H,  $-\text{NCH}_2-$ ), 5.05-5.25 (m, 4H,  $-\text{CH}_2\text{CH}=\text{CH}_2$ ), 5.60-5.70 (m, 1H,  $\text{CH}_2=\text{CH}-$ ), 5.70-5.85 (m, 2H,  $-\text{CH}_2\text{CH}=\text{CH}_2$ ), 6.30-6.40 (m, 1H, *trans*  $\text{CH}_2=\text{CH}-$ ), 6.40-6.50 (m, 1H, *cis*  $\text{CH}_2=\text{CH}-$ ).  $^{13}\text{C}$  NMR (100 MHz,  $\text{CDCl}_3$ ):  $\delta$  (ppm) 48.5, 49.2, 116.9, 117.6, 127.7, 128.4, 132.9, 133.1, 166.5. Anal. Calcd for  $\text{C}_9\text{H}_{13}\text{NO}$  (151.21): C, 71.49; H, 8.67; N, 9.25. Found: C, 71.08; H, 8.77; N, 9.18.

**Synthesis of *N*-propargylacrylamide.** To a solution of propargylamide (13.0 mL, 204 mmol), *N,N*-dimethylaminopyridine (2.44 g, 20.0 mmol), and  $\text{CH}_2\text{Cl}_2$  (150 mL), acryloyl chloride was added dropwise at 0 °C. After stirring for 8 h at r.t., the reaction mixture was filtered, and then condensed under reduced pressure. The crude product was purified by column chromatography (hexane:ethyl acetate = 1:1,  $R_f$  = 0.29), affording *N*-propargylacrylamide as transparent liquid. Yield, 6.20 g (29.9 %).  $^1\text{H}$  NMR (400 MHz,  $\text{CDCl}_3$ ):  $\delta$  (ppm) 2.22-2.26 (t, 1H,  $-\text{C}\equiv\text{CH}$ ), 4.10-

4.14 (m, 2H, -NCH<sub>2</sub>-), 5.64-5.70 (m, 1H, CH<sub>2</sub>=CH-), 5.90-6.10 (br, 1H, NH), 6.06-6.15 (m, 1H, *trans* CH<sub>2</sub>=CH-), 6.27-6.34 (m, 1H, *cis* CH<sub>2</sub>=CH-).

***N*-methyl-*N*-propargyl acrylamide (MPAA).** To a suspension of NaH (3.72 g, 60 wt%, 85.2 mmol) in dry-THF (200 mL), *N*-propargylacrylamide (6.20 g, 56.8 mmol) was added at 0 °C under nitrogen atmosphere. After stirring for 1 h, iodomethane (10.6 mL, 170 mmol) was added at 0 °C under nitrogen atmosphere. The reaction mixture was stirred at r.t. for 24 h, and then, quenched with a portion of water followed by extraction with ethyl acetate. The organic phase was dried over anhydrous MgSO<sub>4</sub>, and concentrated under reduced pressure. The crude product was purified by distillation over CaH<sub>2</sub> under reduced pressure (85 °C/ 6.0 mmHg), affording *N*-propargyl-*N*-methylacrylamide as a pale yellow solid. Yield, 2.34 g (33.5 %). <sup>1</sup>H NMR (400 MHz, CDCl<sub>3</sub>): δ (ppm) 2.19-2.23, 2.29-2.33 (t, 1H, -C≡CH), 3.03-3.07, 3.12-3.16 (s, 3H, NCH<sub>3</sub>), 4.08-4.12, 4.26-4.29 (m, 2H, -NCH<sub>2</sub>-), 5.68-5.75 (m, 1H, CH<sub>2</sub>=CH-), 6.26-6.39 (m, 1H, *trans* CH<sub>2</sub>=CH-), 6.50-6.62 (m, 1H, *cis* CH<sub>2</sub>=CH-). <sup>13</sup>C NMR (100 MHz, CDCl<sub>3</sub>): δ (ppm) 33.6, 34.5, 36.5, 39.7, 72.2, 73.1, 78.0, 78.5, 127.3, 127.6, 128.2, 128.8, 166.1, 166.6.

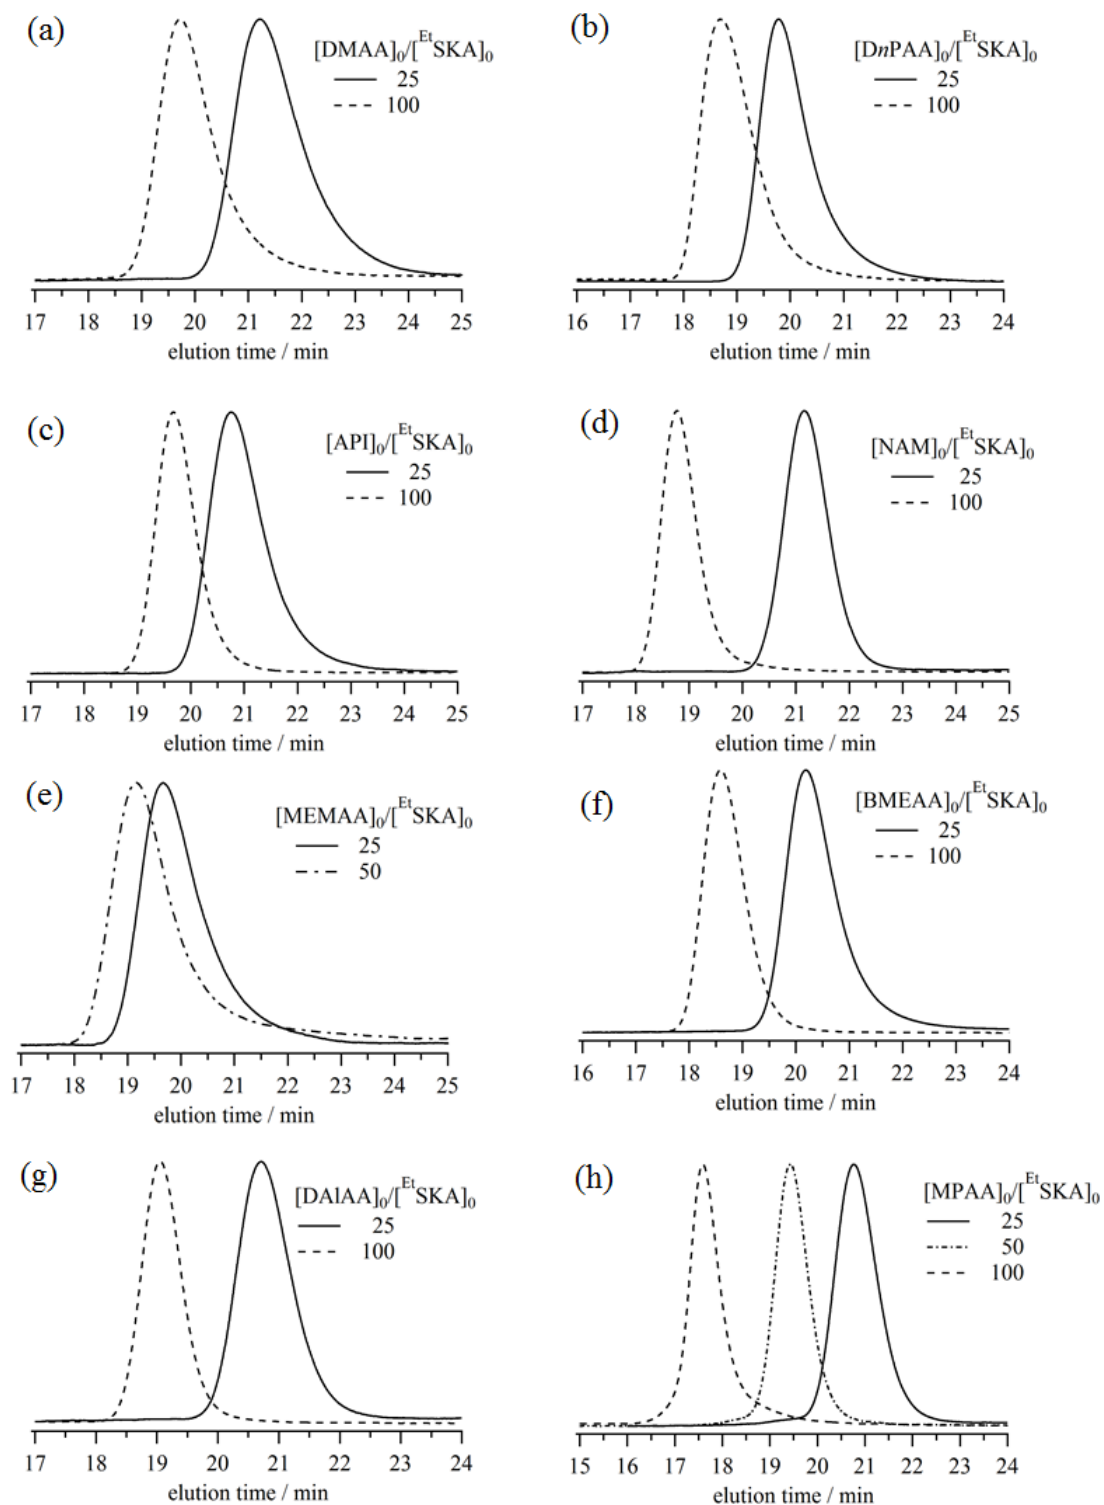

**Figure S1.** SEC traces of the PDAAs obtained from the  $B(C_6F_5)_3$ -catalyzed GTPs of (a) DMAA, (b) DnPAA, (c) API, (d) NAM, (e) MMEAA, (f) BMEAA, (g) DAIAA, and (h) MPAA at various  $[monomer]_0$  to  $[EtSKA]_0$  ratios (eluent, DMF containing  $0.01 \text{ mol L}^{-1}$  LiCl; flow rate,  $0.6 \text{ mL min}^{-1}$ ).

(a)

(b)

(c)

(d)

(e)

(f)

(g)

(h)

(i)

**Figure S2.**  $^1\text{H}$  NMR spectra of (a) PDEAA, (b) PDMAA, (c) PD $n$ PAA, (d) PAPI, (e) PNAM, (f) PMMEAA, (g) PBMEAA, (h) PDAIAA, and (i) PMPAA in  $\text{CDCl}_3$ . (Theoretical DP, 25)





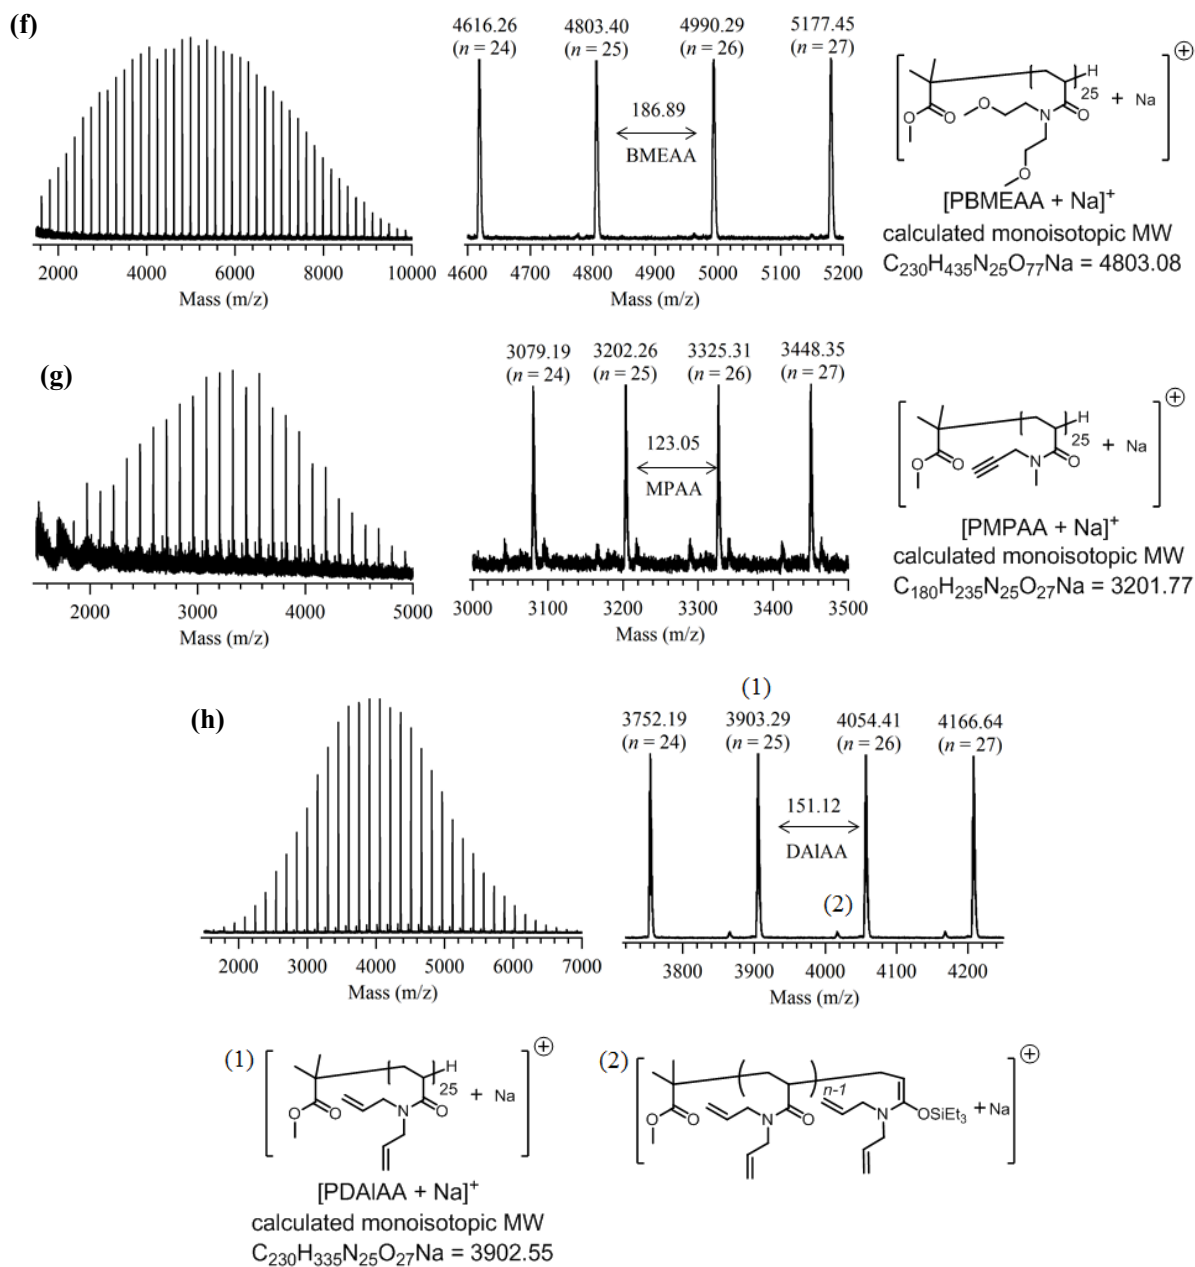

**Figure S3.** MALDI-TOF MS spectra of (a) PDMAA, (b) PD $n$ PAA, (c) PAPI, (d) PNAM, (e) PMMEA, (f) PBMEA, (g) PMPAA, and (h) PDAIAA. (Theoretical DP for each polymer, 25)

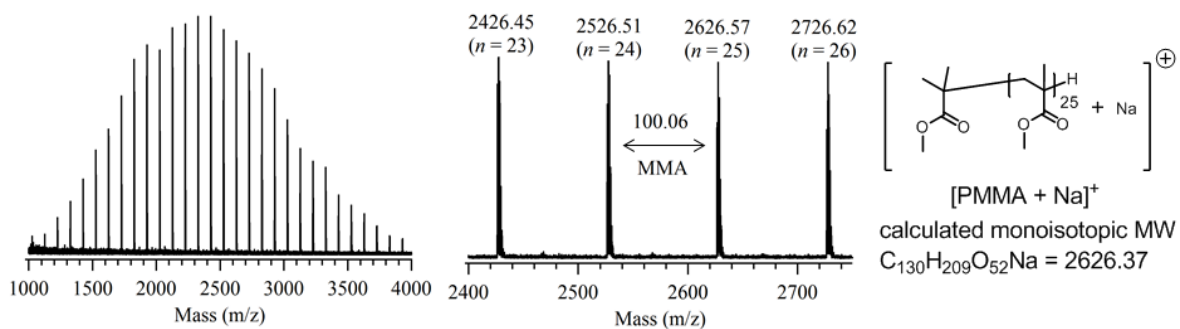

**Figure S4.** MALDI-TOF MS spectrum of the PMMA residue obtained from the low molecular weight part of run 31 shown in Figure 6(b) (dashed line) after purification by preparative SEC.

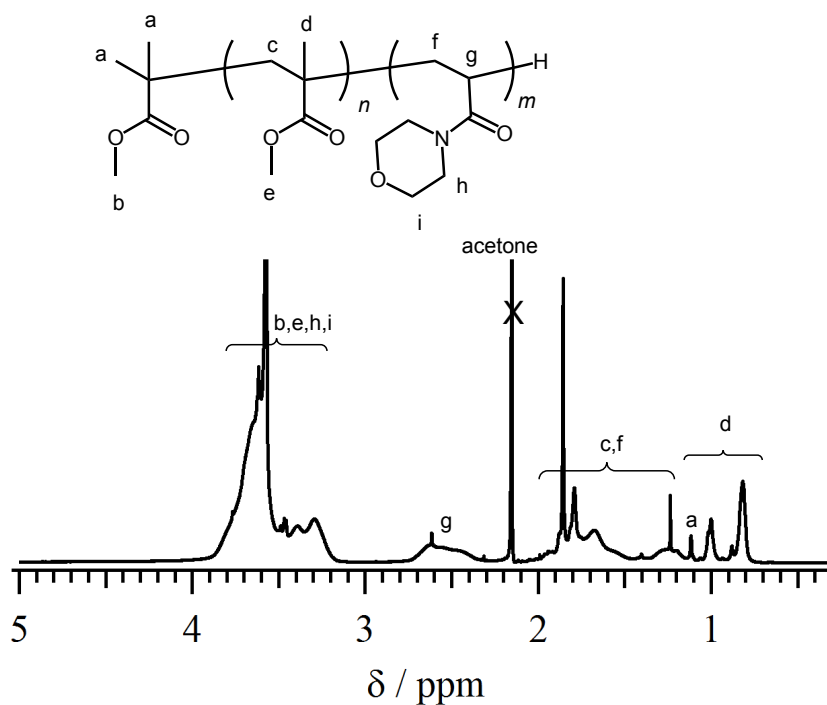

**Figure S5.**  $^1\text{H}$  NMR spectrum of the obtained block copolymer from run 35 in  $\text{CDCl}_3$  (400 MHz).
